# Supplementary material for: Relation between temperature memory effect and multiple-shape memory behaviors based on polymer networks
Source: Royal Society of Chemistry journal article supplement (doi:10.1039/c4ra02600d), 2014-01-01
Supplement: c4ra02600d1.pdf [file c4ra02600d1.pdf]

## Electronic Supplementary Information

### Relation between Temperature Memory Effect and Multiple-Shape Memory

#### Behaviors Based on Polymer Networks

Yaru Wang, Jing Li, Xingjian Li, Yi Pan, Zhaohui Zheng, Xiaobin Ding\* and Yuxing Peng

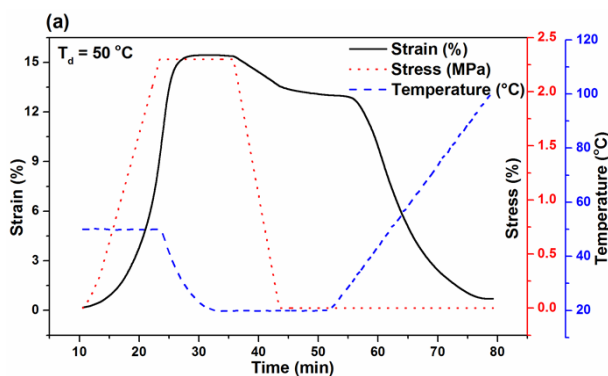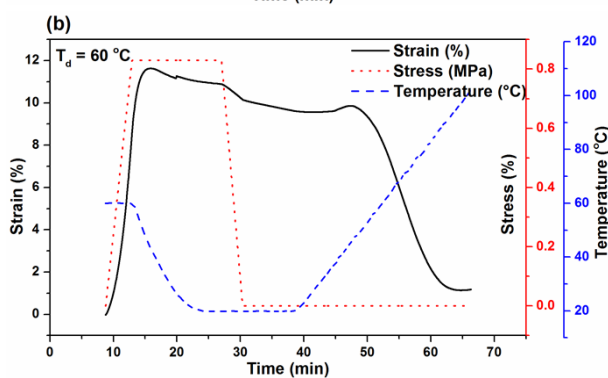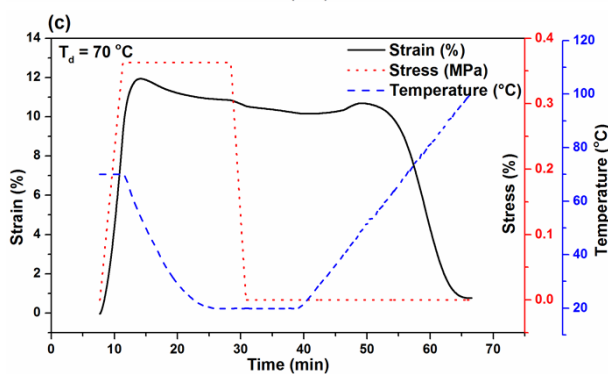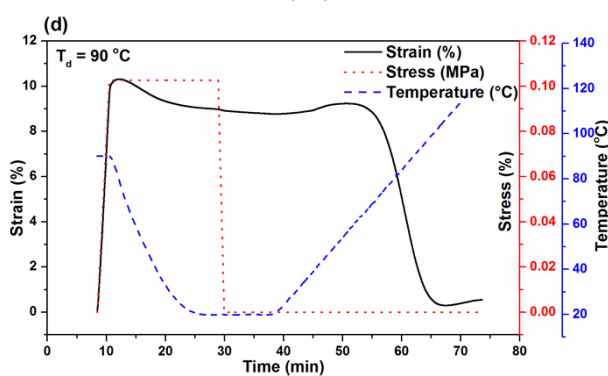

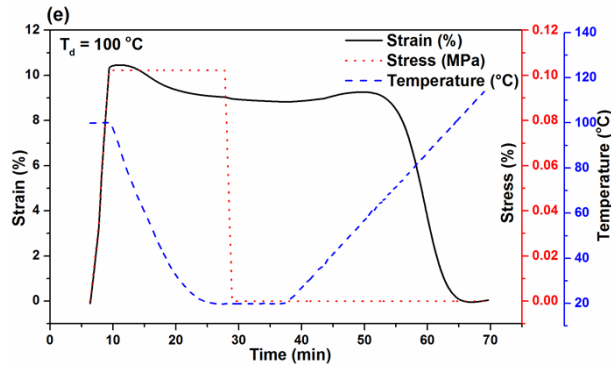

**Figure S1.** Dual-shape memory properties of PMMA/PEG semi-IPN at different  $T_d$ . (a)  $T_d = 50\text{ }^\circ\text{C}$ ,  $R_f = 85.1\%$ ,  $R_r = 95.4\%$ . (b)  $T_d = 60\text{ }^\circ\text{C}$ ,  $R_f = 88.3\%$ ,  $R_r = 89.2\%$ . (c)  $T_d = 70\text{ }^\circ\text{C}$ ,  $R_f = 93.9\%$ ,  $R_r = 93.0\%$ . (d)  $T_d = 90\text{ }^\circ\text{C}$ ,  $R_f = 97.7\%$ ,  $R_r = 93.9\%$ . (e)  $T_d = 100\text{ }^\circ\text{C}$ ,  $R_f = 97.7\%$ ,  $R_r = 99.5\%$ .

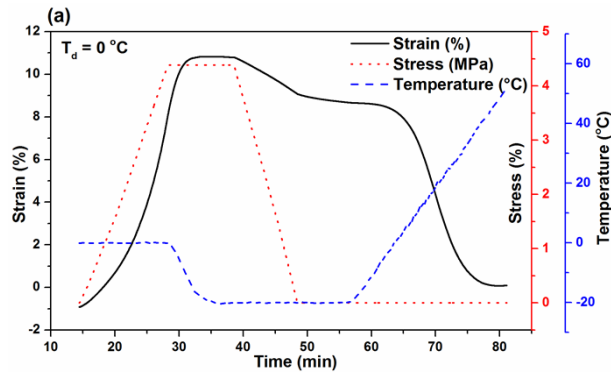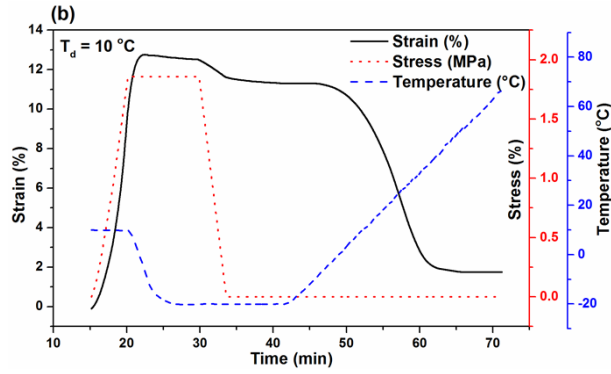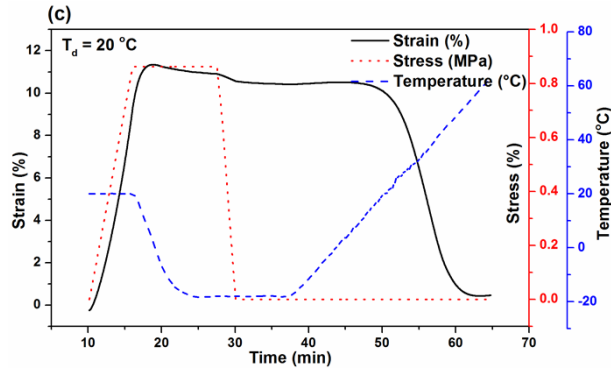

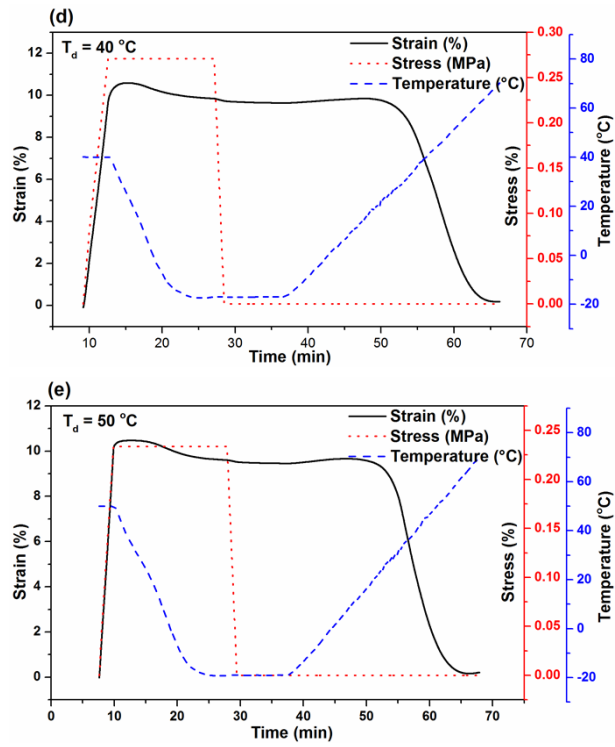

**Figure S2.** Dual-shape memory properties of PMMA-PCL CPN at different  $T_d$ . (a)  $T_d = 0\text{ }^\circ\text{C}$ ,  $R_f = 85.1\%$ ,  $R_r = 91.3\%$ . (b)  $T_d = 10\text{ }^\circ\text{C}$ ,  $R_f = 90.5\%$ ,  $R_r = 85.4\%$ . (c)  $T_d = 20\text{ }^\circ\text{C}$ ,  $R_f = 95.7\%$ ,  $R_r = 93.6\%$ . (d)  $T_d = 40\text{ }^\circ\text{C}$ ,  $R_f = 97.9\%$ ,  $R_r = 98.1\%$ . (e)  $T_d = 50\text{ }^\circ\text{C}$ ,  $R_f = 98.5\%$ ,  $R_r = 97.8\%$ .
